# Supplementary material for: Dual-functional Nanocarrier for Improved Immunochemotherapy of Acute Myeloid Leukemia
Source: Research Square preprint supplement (doi:10.21203/rs.3.rs-9901177/v1), 2026-06-18
Supplement: Supplementary file 1 [file e43d0cf48650f7c4081432e2.docx]

**Dual-functional Nanocarrier for Improved Immunochemotherapy of Acute Myeloid Leukemia**

**Supplementary Figures**

1,5Zhuoya Wan, 2,3,5Limei Wu, 1Yiqing Mu, 1Bei Zhang, 2Jing-Zhou Hou, 4Jingjing Sun, 2,3*Wei Du, and 1*Song Li

1Center for Pharmacogenetics, Department of Pharmaceutical Sciences, University of Pittsburgh School of Pharmacy, Pittsburgh, PA.

2Division of Hematology and Oncology, University of Pittsburgh School of Medicine, Pittsburgh, PA.

3Genome Stability Program, UPMC Hillman Cancer Center, Pittsburgh, PA.

4Department of Pharmaceutical Sciences, College of Pharmacy, University of Nebraska Medical Center, Omaha, NE

5Equal contribution

*Corresponding authors: Song Li, MD, PhD

[sol4@pitt.edu](mailto:sol4@pitt.edu)

OR

Wei Du, MD, PhD

[duw@upmc.edu](mailto:duw@upmc.edu)


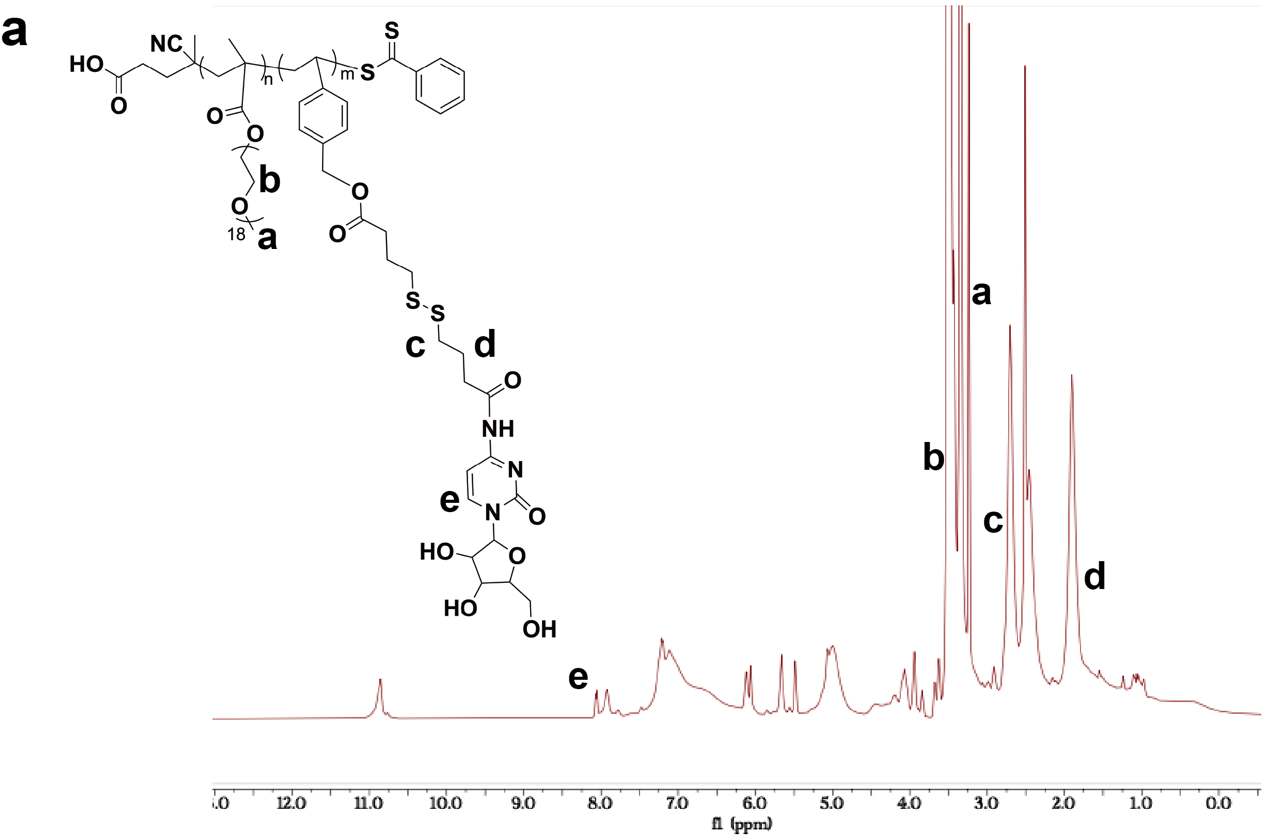


**Supplementary Fig. 1** (**a**)1H-NMR result (in DMSO-d6) of PAraC.

**
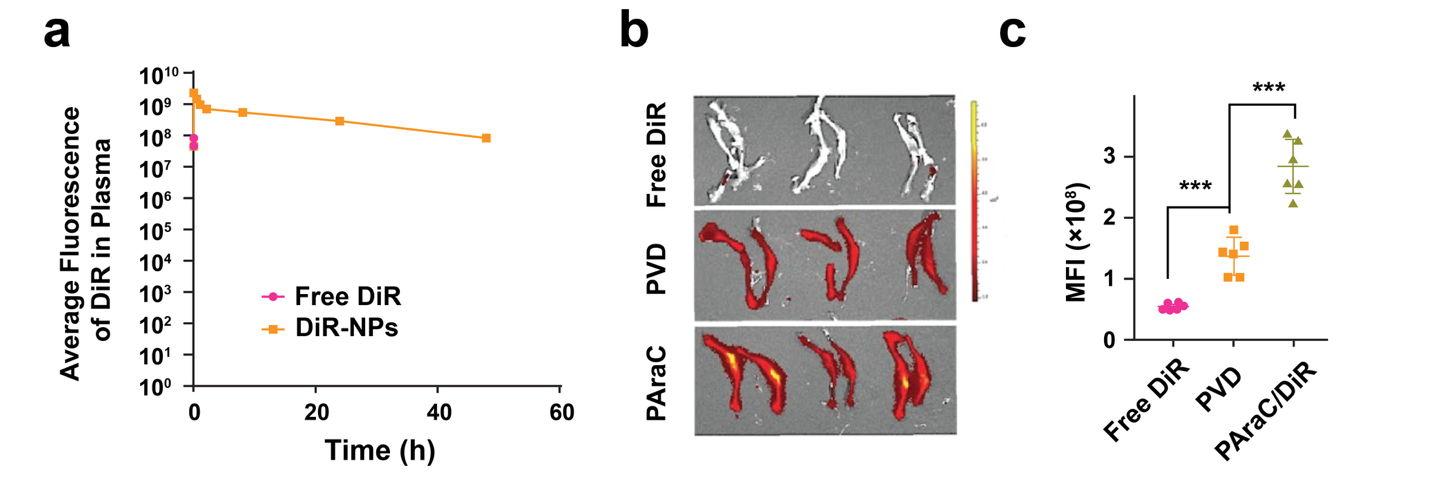
**

**Supplementary Fig.2 Accumulation of PAraC NPs.** (**a**) Free DiR and DiR-loaded PAraC nanoparticles were i.v. injected into mice. Mouse serum was taken from the mice at different time points, and the fluorescence intensity of the serum was measured. (**b-c**) Free DiR, DiR-loaded PAraC, or PVD nanoparticles were i.v. injected into mice (N=3). Twenty-four hours after injection, hind limb bones were taken out for fluorescence imaging and mean fluorescence intensity was quantified (Each dot represents one bone).

**
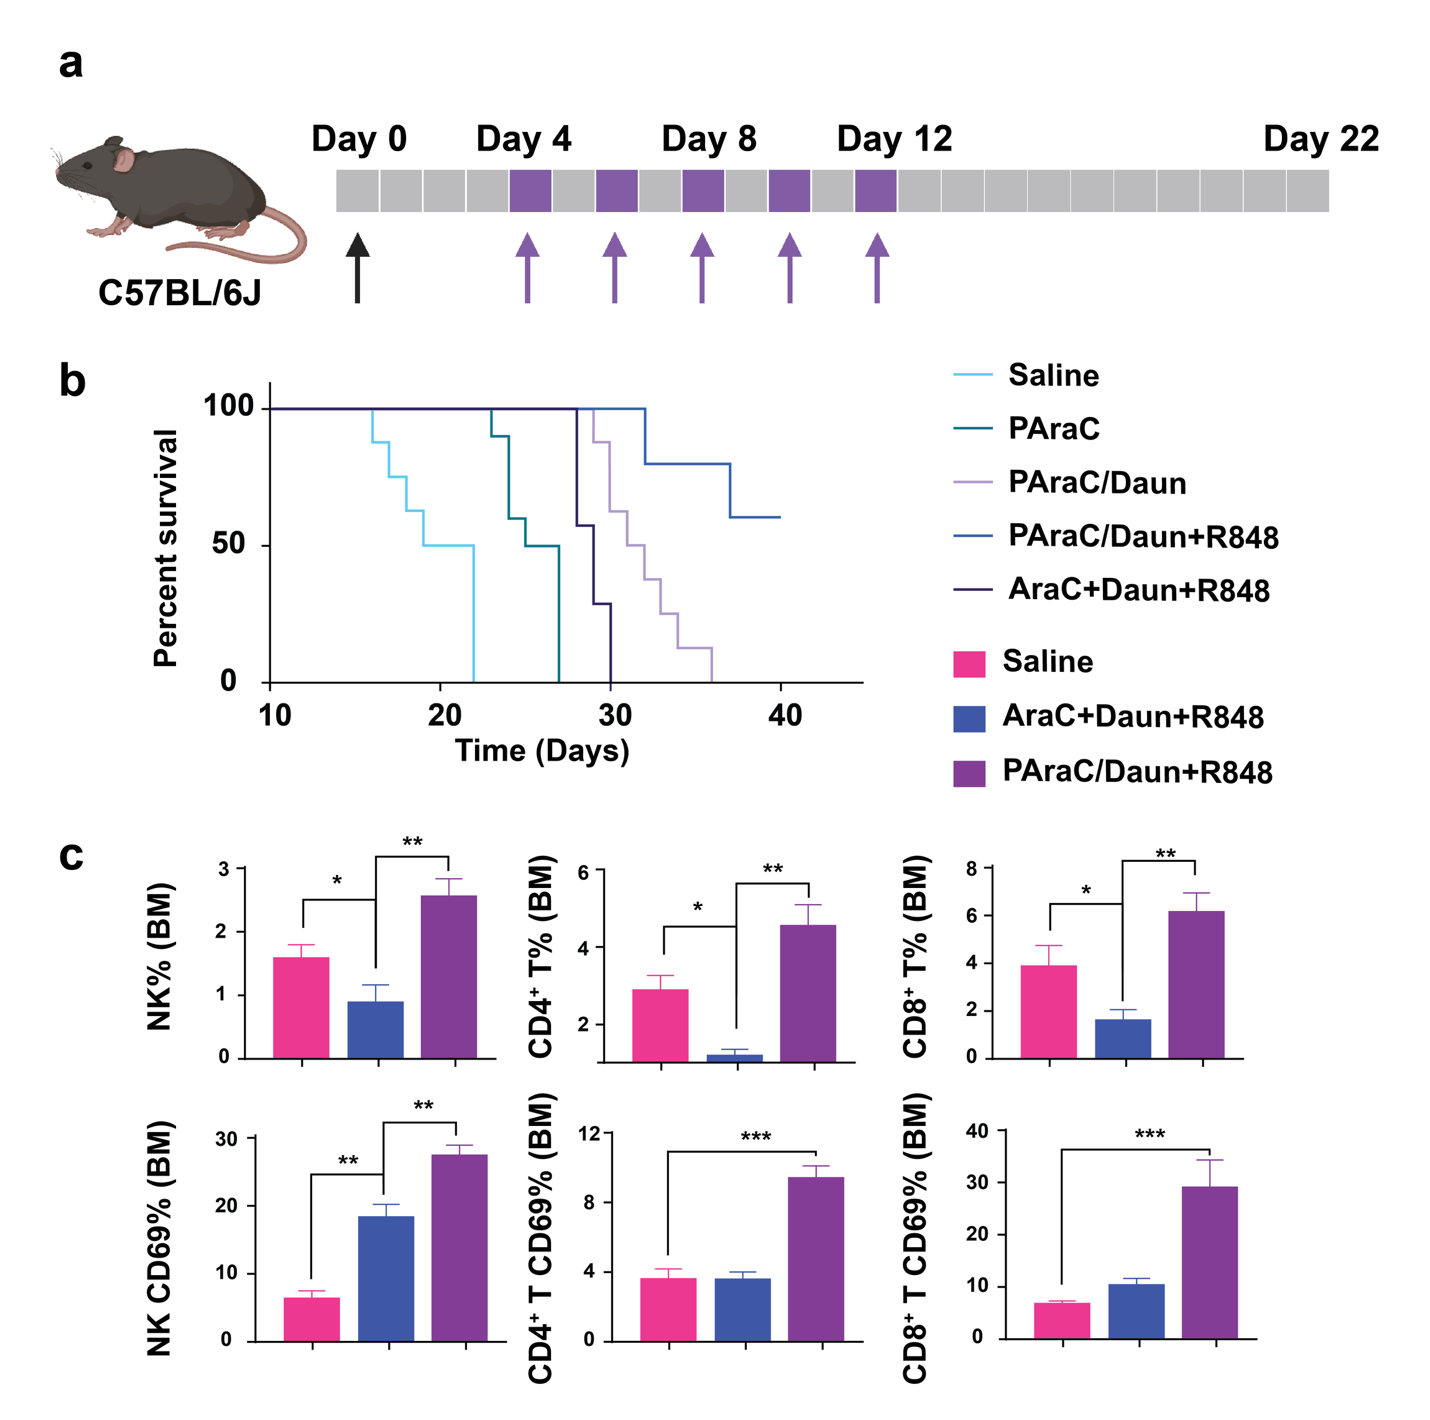
**

**Supplementary Fig. 3 In vivo antitumor effect of PAraC NPs in the C1498 model** (**a**) Workflow of C1498 murine AML model establishment and treatment. Created in BioRender. (**b**) Survival curve of AML mice in different treatment groups (N=8). (**c**) Twenty-two days after AML inoculation, mice from different treatment groups were sacrificed, and bone marrow was isolated for flow study. Numbers of total and activated NK cells, CD4+ T cells, and CD8+ T cells were measured by flow cytometry (N=3).


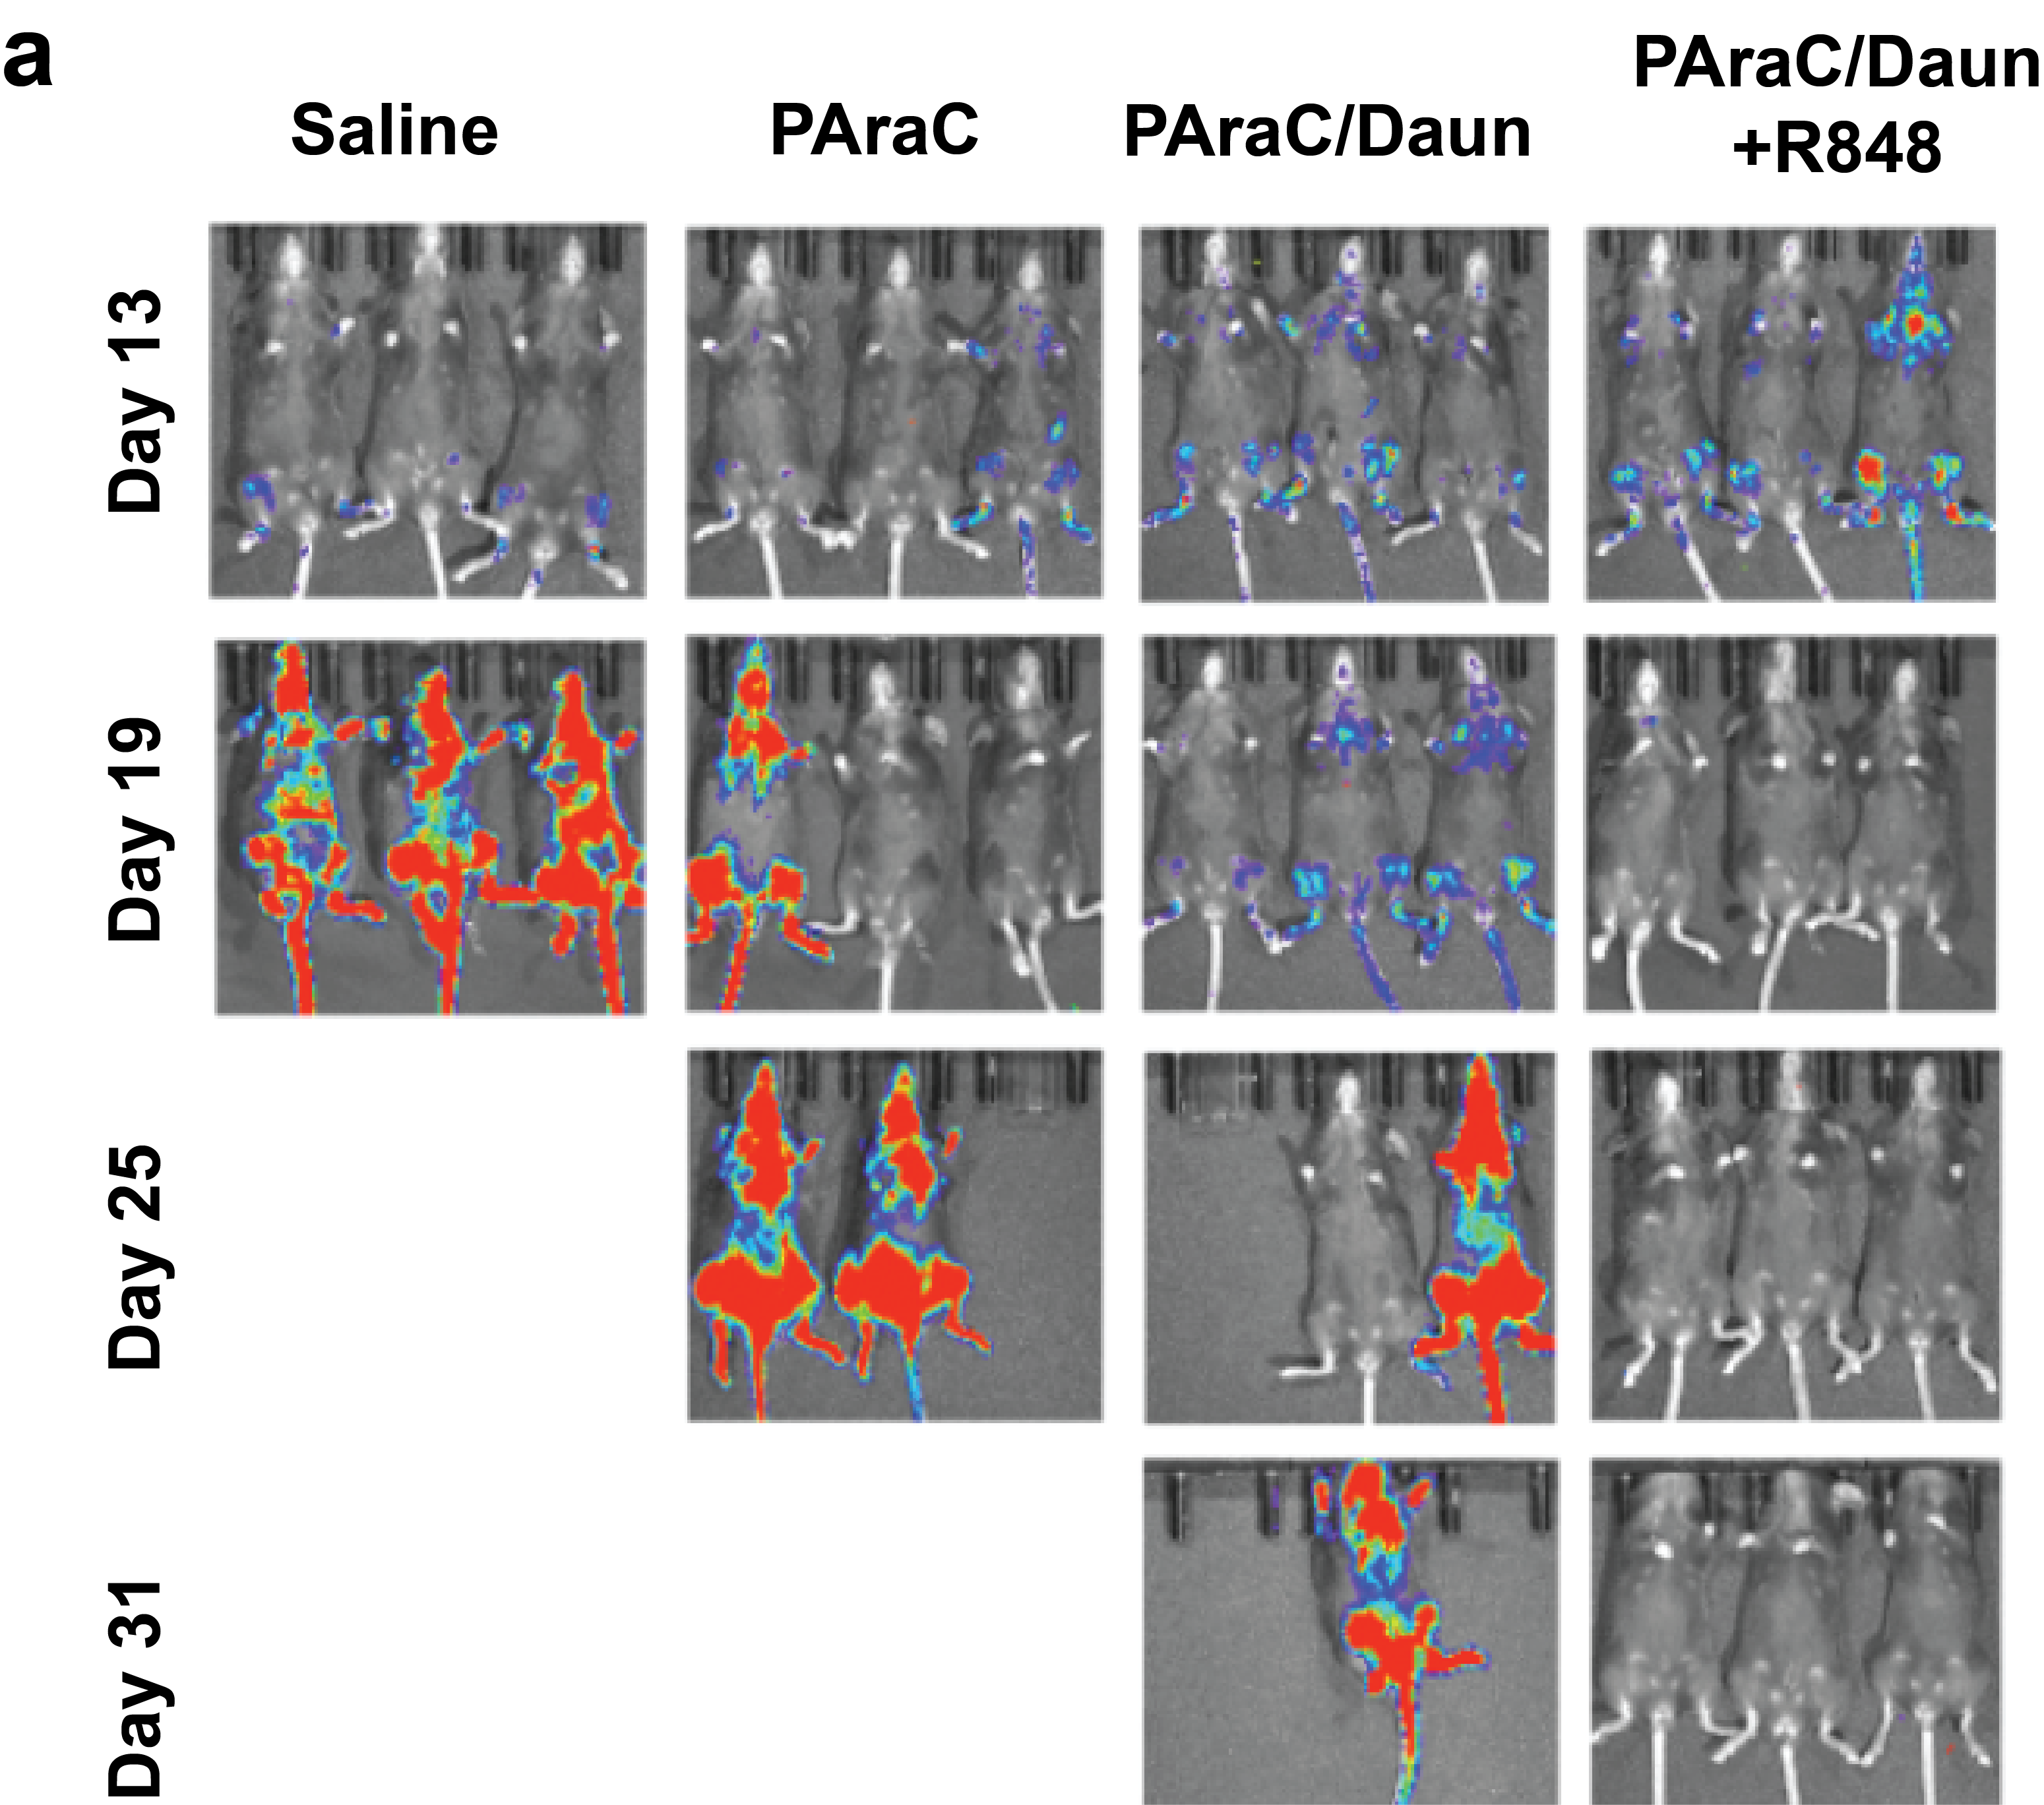


**Supplementary Fig. 4** **In vivo antitumor effect of PAraC NPs in murine ALL models** (**a**) The murine ALL model was established by luciferase (Luc)-expressing p185+ Arf−/− pre-B cells intravenously inoculated into C57Bl/6 mice. Progress of the ALL in different treatment groups was monitored by bioluminescence imaging on different days after inoculation (N=3).

**
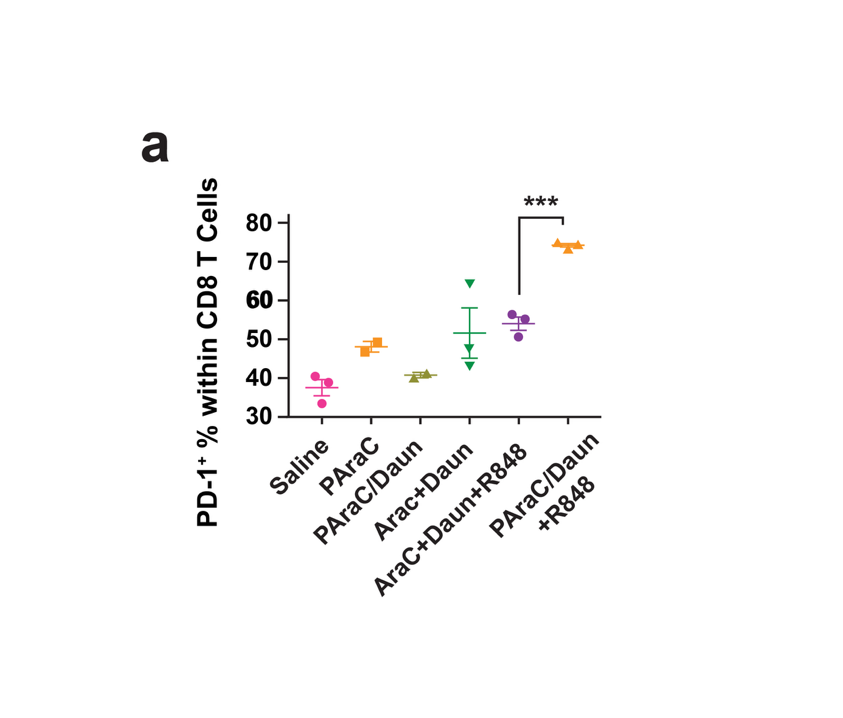
**

**Supplementary Fig. 5 Upregulation of PD-1 in CD8 cells following different treatments.** (**a**) Percentage of PD-1+ cells within CD8+ T cells after different treatments was measured by flow cytometry(N=3).
